# Supplementary material for: Towards a structure-performance relationship for hydrogen storage in Ti-doped NaAlH4nanoparticles
Source: Royal Society of Chemistry journal article supplement (doi:10.1039/c0cc02787a), 2010-12-17
Supplement: c0cc02787a.pdf [file c0cc02787a.pdf]

## Supplemental information

# Towards a structure-performance relationship for hydrogen storage in Ti-doped NaAlH<sub>4</sub> nanoparticles

Cornelis P. Baldé<sup>a</sup>, Olivier Leynaud<sup>b</sup>, Paul Barnes<sup>b</sup>, Elena Peláez-Jiménez<sup>a</sup>, Krijn P. de Jong<sup>a</sup> and Johannes H. Bitter<sup>\*a</sup>

### Sample preparation

For the “Ti first” sample, the pore volume of the CNF (fishbone structure, pore volume 0.6 ml/g, prepared from syngas over Ni/SiO<sub>2</sub>) was impregnated with Ti(OBu)<sub>4</sub> (≥97%, Sigma-Aldrich) in diethylether (0.15 mM, 10 mol % Ti(OBu)<sub>4</sub> compared to NaAlH<sub>4</sub>) until the pore volume was completely filled. The diethylether was removed by drying the impregnated sample at room temperature. Subsequently, 8 wt% NaAlH<sub>4</sub> was impregnated using THF (1 ml solution per gram CNF) as a solvent. Next the sample was dried by cooling to -40 °C in an acetone-dry-ice bath followed by slow heating from -40 to 15 °C over a period of 3 h under reduced pressure (6 mbar). The sample will be referred to as “NaAlH<sub>4</sub>-Ti/CNF”. All sample handling was performed in an inert atmosphere either using Schlenk techniques or using a glove box.

The “alanate first” sample of identical composition was prepared by reversing the impregnation order of NaAlH<sub>4</sub> and Ti(OBu)<sub>4</sub>. CNF were first impregnated with NaAlH<sub>4</sub> in THF and dried at low temperature (-40 to 15 °C, see above). Next, the material was allowed to heat up in an Ar atmosphere to room temperature and the Ti(OBu)<sub>4</sub> dissolved in diethylether was impregnated on the NaAlH<sub>4</sub>/CNF. The sample was immediately cooled to -40 °C and dried as described above. This sample will be referred to as “Ti-NaAlH<sub>4</sub>/CNF”. An undoped nano-NaAlH<sub>4</sub> with a similar NaAlH<sub>4</sub> loading of 8 wt% was prepared using the same procedure. This sample will be referred to as “NaAlH<sub>4</sub>/CNF” and had alanate particle sizes from 20 - 30 nm.<sup>3</sup> For comparison, a bulk sample was prepared by ball milling TiCl<sub>3</sub> with purified NaAlH<sub>4</sub> (Ti:Al= 4.5 mol%) using a SPECS ball milling apparatus as described by Haiduc *et al.*<sup>26</sup> This sample will be referred to as “ball milled TiCl<sub>3</sub>-NaAlH<sub>4</sub>”.

## Reloading of samples

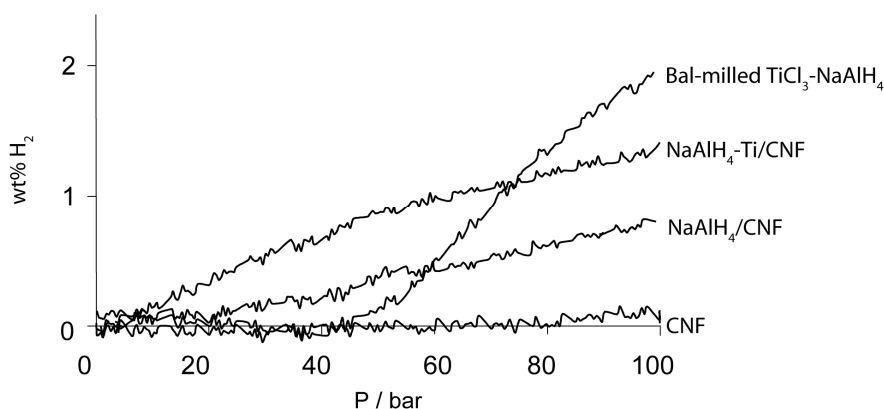

**Figure S1:** H<sub>2</sub> absorption for 1<sup>st</sup> absorption step at 115 °C.  $\Delta P/\Delta t = 1.38 \text{ bar min}^{-1}$ ; the uptake has been normalized to the mass of NaAlH<sub>4</sub>

Figure S1 shows H<sub>2</sub> uptake profiles at 115 °C, after the first desorption at 250 °C, as function of pressure for NaAlH<sub>4</sub>/CNF, NaAlH<sub>4</sub>-Ti/CNF, ball-milled TiCl<sub>3</sub>-NaAlH<sub>4</sub>, and CNF. CNF (without NaAlH<sub>4</sub> or Ti(OBu)<sub>4</sub> deposition) did not show any appreciable uptake from 0.1 to 100 bar H<sub>2</sub>. Ball-milled TiCl<sub>3</sub>-NaAlH<sub>4</sub> started to absorb H<sub>2</sub> from 45 bar H<sub>2</sub> pressure and absorbed 1.90 wt% H<sub>2</sub> at 100 bar.

NaAlH<sub>4</sub>/CNF absorbed H<sub>2</sub> from a pressure of 20 bar and absorbed 0.85 wt% H<sub>2</sub> (normalized to the mass of NaAlH<sub>4</sub>) at 100 bar. Table S1 shows that the absorption capacities in the second and third cycles were respectively 0.18 and 0.26 wt% H<sub>2</sub>.

NaAlH<sub>4</sub>-Ti/CNF could be reloaded at an unprecedented low pressure of 10 bar; 1.38 wt% H<sub>2</sub> could be reabsorbed after the first desorption. This number decreased to 0.76 and 0.53 wt % after the 2<sup>nd</sup> and 3<sup>rd</sup> cycle (Table S1). XPS studies (not shown here) indicated that after desorption NaH was highly dispersed over the support. This might make the recombination of NaH and Al with H<sub>2</sub> to NaAlH<sub>4</sub> difficult thus decreasing the hydrogen storage capacity in the next cycle.

## EXAFS analysis

**Table S1.** Cycle tests of hydrogen absorption of NaAlH<sub>4</sub>/CNF and NaAlH<sub>4</sub>-Ti/CNF after desorption at 250 °C.

|                                         | 1 <sup>st</sup> Abs <sup>+</sup> | 2 <sup>nd</sup> Abs <sup>+</sup> | 3 <sup>rd</sup> Abs <sup>+</sup> |
|-----------------------------------------|----------------------------------|----------------------------------|----------------------------------|
|                                         | wt% H <sub>2</sub>               | wt% H <sub>2</sub>               | wt% H <sub>2</sub>               |
| NaAlH <sub>4</sub> -Ti/CNF <sup>*</sup> | 1.38                             | 0.76                             | 0.53                             |
| NaAlH <sub>4</sub> /CNF <sup>#</sup>    | 0.85                             | 0.18                             | 0.26                             |

<sup>\*</sup> The maximum H<sub>2</sub> absorption capacity is 2.50 wt% H<sub>2</sub>.

<sup>#</sup> Maximum capacity is 5.6 wt% H<sub>2</sub> normalized to NaAlH<sub>4</sub> (assuming NaAlH<sub>4</sub> decomposes to NaH).

<sup>+</sup> In each desorption step > 90% of amount of hydrogen was released.

**Table S2.** Ti K-edge EXAFS fit of as prepared NaAlH<sub>4</sub>-Ti/CNF and Ti-NaAlH<sub>4</sub>/CNF.  $\Delta k = 3.3$ - $11 \text{ \AA}^{-1}$ .

|                             | Fitrange<br>/ $\text{\AA}$ | Atom  | <i>N</i> | $\Delta\sigma^2$<br>/ $10^3 \text{ \AA}^{-2}$ | <i>R</i><br>/ $\text{\AA}$ | <i>E<sub>o</sub></i><br>/ eV | <i>k</i> <sup>2</sup> variance |      |
|-----------------------------|----------------------------|-------|----------|-----------------------------------------------|----------------------------|------------------------------|--------------------------------|------|
|                             |                            |       |          |                                               |                            |                              | Im.                            | Abs. |
| NaAlH <sub>4</sub> -Ti/CNF  | 1.5-3.8                    | Ti-C  | 2.3      | 4.48                                          | 2.39                       | 8.75                         | 0.40                           | 0.17 |
|                             |                            | Ti-Al | 2.9      | 3.36                                          | 2.69                       | 3.42                         |                                |      |
|                             |                            | Ti-Al | 1.6      | 9.08                                          | 3.09                       | 1.81                         |                                |      |
|                             |                            | Ti-Ti | 0.7      | -0.90                                         | 3.63                       | -3.10                        |                                |      |
| Ti-NaAlH <sub>4</sub> -/CNF | 1.3-2.9                    | Ti-O  | 3.9      | 7.03                                          | 2.02                       | 2.18                         | 0.09                           | 0.07 |
|                             |                            | Ti-C  | 6.2      | 0.30                                          | 2.49                       | -12.20                       |                                |      |

---

|       |     |      |      |       |
|-------|-----|------|------|-------|
| Ti-Ti | 3.0 | 6.01 | 2.85 | -0.13 |
|-------|-----|------|------|-------|

---

Maximum free parameters is 18 or 19.

The EXAFS (data collected at station E4 at hasylab, Hamburg) fit of NaAlH<sub>4</sub>-Ti/CNF revealed that Ti is on average surrounded with 2.3 C/O atoms at 2.39 Å in its first shell (Table S2). In the next two shells, 2.9 Al atoms at 2.69 Å and 1.6 Al atoms at 3.09 Å were fitted. The first Ti atom was found at 3.63 Å with a coordination number of 0.7. The fit parameters of Ti-NaAlH<sub>4</sub>/CNF reveal that Ti is surrounded with 3.9 O/C atoms at 2.02 Å and 6.2 C/O atoms at 2.49 Å. In the next shell, 3 Ti atoms are present at 2.85 Å.

The absence of Na or Al atoms in the local structure of Ti-NaAlH<sub>4</sub>-CNF indicates that Ti did not interact with the NaAlH<sub>4</sub> to a level detectable by EXAFS (10%). Since the local structure comprised the same atoms as the original Ti-precursor (Ti(OBu)<sub>4</sub>), it is concluded that the majority of “Ti” was present as nanoparticles of Ti(OBu)<sub>4</sub>, or a decomposition product thereof, in the as-prepared Ti-NaAlH<sub>4</sub>/CNF. The large value of E<sub>0</sub> for the Ti-C absorber-scatter pair indicates that the nature of the Ti-C bond is different from that in the used reference compound (TiC).

Fitting of the EXAFS of NaAlH<sub>4</sub>-Ti/CNF revealed that 2.3 C atoms at 2.39 Å surround the Ti atom in its first coordination shell. Please note that C and O are indistinguishable but chemical knowledge is used to discriminate between C and O. The Ti-C shortest bond distance in TiC is 2.16 Å.<sup>S1</sup> The strong deviation to the Ti-C distance of 2.39 Å in NaAlH<sub>4</sub>-Ti/CNF indicates that TiC did not form. Most logically, the carbon atom originated from the CNF support, implying that the Ti species was highly dispersed on the surface of the CNF. This might also explain the large E<sub>0</sub> value i.e. the Ti-C bond in the sample is dissimilar to that in the Ti-C reference. In addition the carbon scatterer in this sample is also different from that in Ti-NaAlH<sub>4</sub>/CNF as seen from the Ti-C bond length and different E<sub>0</sub> values. Part of the difference in E<sub>0</sub> values can be explained by a difference in oxidation state of the Ti, which is higher in butoxide-doped samples, as observed before for bulk samples.<sup>S2</sup> In the next shells 2.9 Al atoms were fitted at 2.69 Å and 1.6 Al atoms at 3.09 Å. The presence of Al atoms in the local structure indicates that the Ti(OBu)<sub>4</sub> reacts with NaAlH<sub>4</sub> during the synthesis.

Ti-Al distances in ball milled  $\text{TiCl}_3\text{-NaAlH}_4$  range from 2.71 to 2.92 Å.<sup>S2-5</sup> The shortest distance is comparable to that found for the first Ti-Al shell present in our samples. However the longer Ti-Al distance in our samples (3.09 Å; Table 4) is significantly longer than reported before. It has been calculated however, that Ti-Al distances differ for Ti in  $\text{NaAlH}_4$  nanoparticles in comparison to bulk Ti-doped  $\text{NaAlH}_4$ .<sup>S6</sup> The total coordination number of all the closest shells around Ti is 7.5, which is considerably smaller than the coordination number of 12 in bulk materials. Thus suggesting that our particles deviate significantly from bulk material. Therefore the long Ti-Al distance observed in this study might be the result of the changed properties of nano-sized alanate.<sup>S7</sup>

Since our samples have a total Ti-Al coordination number of 4.5 and a Ti-Ti coordination number of 0.7 the total Ti:Al ratio in our particles is  $\sim 1:6.4$ . Thus the  $\text{TiAl}_x$  species have an average stoichiometry of  $\text{TiAl}_{6.4}$ .

### Ex-situ XRD

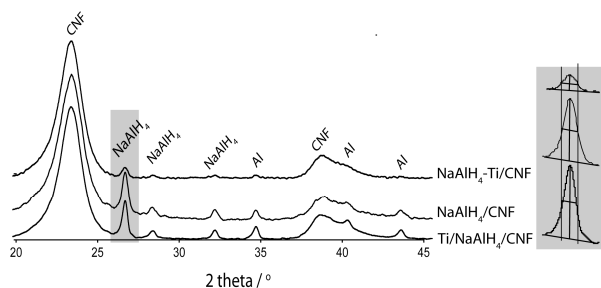

**Figure S2** XRD from  $\text{NaAlH}_4/\text{CNF}$ ,  $\text{Ti-NaAlH}_4/\text{CNF}$  and  $\text{NaAlH}_4\text{-Ti}/\text{CNF}$  at 25 °C ( $\lambda = 1.4$  Å).

Figure S2 shows the X-ray diffraction patterns of as-prepared  $\text{NaAlH}_4/\text{CNF}$ ,  $\text{Ti-NaAlH}_4/\text{CNF}$  and  $\text{NaAlH}_4\text{-Ti}/\text{CNF}$  at room temperature. Two broadened CNF diffractions were present at  $2\theta = 23.55^\circ$  and  $38.86^\circ$ .  $\text{NaAlH}_4$  was detected at  $2\theta$  values of  $26.85^\circ$ ,  $28.56^\circ$  and  $32.33^\circ$ . The inset in Figure 2 shows the full width at half maximum (FWHM) of the  $\text{NaAlH}_4$

diffraction and indicates that they were comparable for all measured samples. Using the Debye-Scherrer equation, a crystallite size of  $\sim 20$  nm was calculated for the crystalline part of the samples. Ti containing species were never observed in the XRD studies indicating that those were XRD amorphous. Diffraction lines at  $2\theta = 34.79^\circ$ ,  $40.34^\circ$  and  $43.70^\circ$  were ascribed to Al and indicate that the samples lost  $\text{H}_2$  during sample handling i.e.,  $\text{NaAlH}_4 \leftrightarrow \text{NaH} + \text{Al} + 1\frac{1}{2} \text{H}_2$  (eq 1).

## Potential pathways for hydrogen desorption

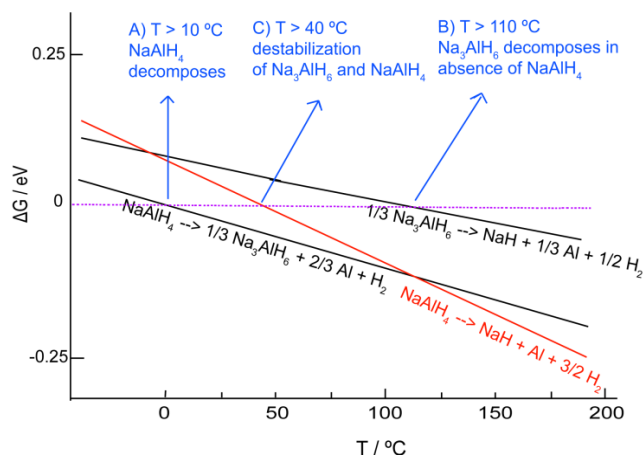

**Figure S3.** Temperature dependent differences for free energy change for the decompositions of  $\text{NaAlH}_4$  and  $\text{Na}_3\text{AlH}_6$  (black lines), data derived from Ke and Tanaka.<sup>S8</sup> Red line is the free energy change for the one-step decomposition of  $\text{NaAlH}_4$  to  $\text{NaH}$  and  $\text{Al}$ .

Figure S3 shows that between ( $40\text{ °C} < T < 110\text{ °C}$ )  $\text{NaAlH}_4$  can react with  $\text{Na}_3\text{AlH}_6$  to form  $\text{NaH}$ ,  $\text{Al}$  and  $\text{H}_2$ . In other words the change in Gibbs free energy of the combined reaction i.e. decomposition of  $\text{NaAlH}_4$  plus decomposition of  $\text{Na}_3\text{AlH}_6$  is more favourable. In contrast, the decomposition of  $\text{Na}_3\text{AlH}_6$  as such has a positive  $\Delta G$  in that temperature range thus does not occur spontaneously. This implies that more hydrogen can be liberated from  $\text{NaAlH}_4$  by combining the two reactions at a temperature range where  $\text{Na}_3\text{AlH}_6$  is still thermodynamically stable. A speculative explanation is that the  $\text{NaAlH}_4$  reacts to  $\text{Na}_3\text{AlH}_6$  (reaction 1) as an intermediate step followed by a very fast reaction between  $\text{Na}_3\text{AlH}_6$  and remaining  $\text{NaAlH}_4$ , reaction (2). When reactions 1 and 2 are added together, it leads to the proposed direct decomposition of  $\text{NaAlH}_4$  to  $\text{H}_2$ ,  $\text{NaH}$  and  $\text{Al}$  (reaction 3). Apparently this combination of reactions (1) and (2) only occurs with nano-sized sodium alanate as indicated by the XRD study reported in Figure 2; bulk materials decompose via a two step mechanism with the formation of the  $\text{Na}_3\text{AlH}_6$  intermediate.

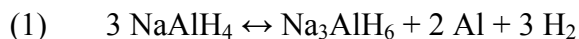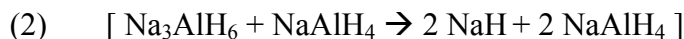

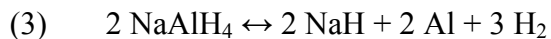

The formation of NaH was not observed throughout the experiment which indicates that NaH was either amorphous, or in the form of nanoparticles smaller than 10 nm.

S1. P. Ehrlich, *Zeitschrift fuer Anorganische und Allgemeine Chemie*, 1949, **259**, 1

S2. C. P. Baldé, A. M. J. van der Eerden, H. A. Stil, F. M. F. de Groot, F. M. F. K. P. de Jong, and J.H. Bitter, *J. Alloys Compd.* 2007, **446-447**, 232.

S3. C. P. Baldé, H. A. Stil, A. M. J. van der Eerden, K. P. de Jong and J. H. Bitter, *J. Phys. Chem. C*, 2007, **111**, 2797.

S4. M. Felderhoff, K. Klementiev, W. Grunert, B. Spliethoff, B. Tesche, J. M. B. Colbe, B. Bogdanovic, M. Hartel, A. Pommerin, F. Schüth and C. Weidenthaler, *Phys. Chem. Chem. Phys.* 2004, **6**, 4369.

S5. A. Léon, O. Kircher, M. Fichtner, J. Rothe and D. Schild, D., *J. Phys. Chem. B*, 2006, **110**, 1192.

S6. J. Liu and Q. Ge, *Chem. Commun.* 2006, 1822.

S7. A. Jentys, *Phys. Chem. Chem. Phys.* 1999, **1**, 4059.

S8. X. Ke and I. Tanaka, *Phys Rev B: Condens. Matter Mater.* 2005, **71**, 024117
